# Supplementary material for: Transcriptome Profiling of Starvation in the Peripheral Chemosensory Organs of the Crop Pest Spodoptera littoralis Caterpillars
Source: MDPI journal article supplement (doi:10.3390/insects12070573), 2021-06-23
Supplement: s1 [file s1]

**Table S3:** Transcripts with downregulated expression after 24 h of larval starvation. “∞” denotes that the transcript is expressed only in fed larvae. Full sequences are available as Supplementary Materials (File S2).

| Transcript ID<br>(According to [32])    | Fold Change<br>(Fed/Starved) | Log <sub>2</sub> Fold Change<br>(Fed/Starved) | <i>p</i> -Value            | Adjusted <i>p</i> -Value  | BlastX Best Hit                                  |
|-----------------------------------------|------------------------------|-----------------------------------------------|----------------------------|---------------------------|--------------------------------------------------|
| Slit_qualite_rep_c1364                  | 5.679                        | 2.506                                         | $9.691638 \times 10^{-5}$  | $5.201717 \times 10^{-2}$ | nd1 gene product                                 |
| Slit_qualite_rep_c14232                 | 10.125                       | 3.340                                         | $8.852804 \times 10^{-7}$  | $1.140359 \times 10^{-3}$ | hypothetical protein<br>ESOG_04481               |
| gi 300756729 gb FQ020<br>363.1 FQ020363 | 10.673                       | 3.416                                         | $1.536410 \times 10^{-6}$  | $1.915260 \times 10^{-3}$ | takeout-like                                     |
| Slit_qualite_rep_c11761                 | 11.250                       | 3.492                                         | $2.020365 \times 10^{-7}$  | $4.745312 \times 10^{-4}$ | pancreatic lipase 3                              |
| Slit_qualite_rep_c7966                  | 11.667                       | 3.544                                         | $2.258753 \times 10^{-6}$  | $2.470429 \times 10^{-3}$ | REPAT46                                          |
| Slit_qualite_c21059                     | 12.500                       | 3.644                                         | $1.684614 \times 10^{-5}$  | $1.205560 \times 10^{-2}$ | hypothetical protein<br>KGM_15902                |
| Slit_qualite_rep_c5564                  | 13.636                       | 3.769                                         | $2.074716 \times 10^{-7}$  | $4.745312 \times 10^{-4}$ | chitin-binding protein                           |
| Slit_qualite_c6733                      | 13.750                       | 3.781                                         | $9.915927 \times 10^{-5}$  | $5.249193 \times 10^{-2}$ | hypothetical protein<br>KGM_08533                |
| Slit_qualite_rep_c5152                  | 16.875                       | 4.077                                         | $2.946257 \times 10^{-6}$  | $2.919363 \times 10^{-3}$ | conserved hypothetical<br>protein                |
| Slit_qualite_c12703                     | 17.083                       | 4.095                                         | $1.424471 \times 10^{-5}$  | $1.079358 \times 10^{-2}$ | chitin-binding protein                           |
| Slit_qualite_rep_c62894                 | 17.292                       | 4.112                                         | $2.333116 \times 10^{-7}$  | $4.745312 \times 10^{-4}$ | takeout-like                                     |
| Slit_qualite_rep_c11060                 | 17.716                       | 4.147                                         | $6.626990 \times 10^{-9}$  | $3.312618 \times 10^{-5}$ | takeout                                          |
| Slit_qualite_c8499                      | 18.233                       | 4.188                                         | $2.216975 \times 10^{-9}$  | $1.713455 \times 10^{-5}$ | conserved hypothetical<br>protein                |
| Slit_qualite_rep_c29519                 | 19.063                       | 4.253                                         | $8.361418 \times 10^{-7}$  | $1.140359 \times 10^{-3}$ | chitin-binding protein                           |
| Slit_qualite_rep_c2501                  | 20.000                       | 4.322                                         | $5.026199 \times 10^{-7}$  | $8.200437 \times 10^{-4}$ | uncharacterized protein                          |
| Slit_qualite_rep_c30198                 | 21.250                       | 4.409                                         | $2.618540 \times 10^{-7}$  | $5.059544 \times 10^{-4}$ | conserved hypothetical<br>protein                |
| Slit_qualite_rep_c6676                  | 22.750                       | 4.508                                         | $3.152956 \times 10^{-8}$  | $1.353809 \times 10^{-4}$ | chitin-binding protein                           |
| Slit_qualite_c17729                     | 33.125                       | 5.050                                         | $1.606508 \times 10^{-10}$ | $3.104095 \times 10^{-6}$ | conserved hypothetical<br>protein                |
| Slit_qualite_c14464                     | 35.000                       | 5.129                                         | $1.563870 \times 10^{-7}$  | $4.745312 \times 10^{-4}$ | chitin-binding protein                           |
| Slit_qualite_c28227                     | 37.500                       | 5.229                                         | $1.533426 \times 10^{-5}$  | $1.139572 \times 10^{-2}$ | takeout-like                                     |
| Slit_qualite_c14915                     | ∞                            | ∞                                             | $2.802719 \times 10^{-5}$  | $1.835733 \times 10^{-2}$ | uncharacterized protein                          |
| Slit_qualite_c18122                     | ∞                            | ∞                                             | $5.667373 \times 10^{-7}$  | $8.760399 \times 10^{-4}$ | chitin-binding protein                           |
| Slit_qualite_rep_c15771                 | ∞                            | ∞                                             | $1.952352 \times 10^{-4}$  | $9.314406 \times 10^{-2}$ | trypsin-like serine<br>protease                  |
| Slit_qualite_rep_c63050                 | ∞                            | ∞                                             | $1.952352 \times 10^{-4}$  | $9.314406 \times 10^{-2}$ | REPAT40                                          |
| Slit_qualite_c61228                     | ∞                            | ∞                                             | $4.954356 \times 10^{-9}$  | $3.190936 \times 10^{-5}$ | peritrophic membrane<br>chitin-binding protein 1 |
| gi 300752999 gb FQ030<br>056.1 FQ030056 | ∞                            | ∞                                             | $1.297636 \times 10^{-4}$  | $6.438438 \times 10^{-2}$ | takeout-like                                     |
