# Supplementary material for: Transcriptome Profiling of Starvation in the Peripheral Chemosensory Organs of the Crop Pest Spodoptera littoralis Caterpillars
Source: MDPI journal article supplement (doi:10.3390/insects12070573), 2021-06-23
Supplement: s1 [file s1]

**Table S2:** Transcripts with upregulated expression after 24 h of larval starvation. Fold changes are expressed as fed/starved. “ $-\infty$ ” denotes that the transcript is expressed only in starved larvae. Full sequences are available as Supplementary Materials (File S1).

| Transcript ID<br>(According to [32])    | Fold Change<br>(Fed/Starved) | Log <sub>2</sub> Fold Change | <i>p</i> -Value            | Adjusted <i>p</i> -Value   | BlastX Best Hit                                        |
|-----------------------------------------|------------------------------|------------------------------|----------------------------|----------------------------|--------------------------------------------------------|
| Slit_qualite_rep_c13175                 | 0.000                        | $-\infty$                    | $1.117716 \times 10^{-16}$ | $4.319302 \times 10^{-12}$ | hypothetical protein<br>KGM_12805                      |
| Slit_qualite_c39402                     | 0.000                        | $-\infty$                    | $1.283468 \times 10^{-4}$  | $6.438438 \times 10^{-2}$  | cuticular protein rr-2<br>motif 70                     |
| Slit_qualite_c39105                     | 0.027                        | -5.233                       | $8.452419 \times 10^{-6}$  | $7.423529 \times 10^{-3}$  | cytochrome p450                                        |
| Slit_qualite_rep_c65044                 | 0.041                        | -4.597                       | $1.364561 \times 10^{-9}$  | $1.318303 \times 10^{-5}$  | takeout-like                                           |
| Slit_qualite_rep_c7469                  | 0.044                        | -4.492                       | $5.645909 \times 10^{-10}$ | $7.272684 \times 10^{-6}$  | farnesyl diphosphate<br>synthase 3                     |
| Slit_qualite_rep_c62831                 | 0.047                        | -4.420                       | $1.664670 \times 10^{-7}$  | $4.745312 \times 10^{-4}$  | cytochrome p450 4g4                                    |
| Slit_qualite_rep_c35117                 | 0.048                        | -4.379                       | $6.857713 \times 10^{-9}$  | $3.312618 \times 10^{-5}$  | cytochrome p450 4c3                                    |
| Slit_qualite_rep_c68996                 | 0.060                        | -4.070                       | $1.022418 \times 10^{-5}$  | $8.231318 \times 10^{-3}$  | takeout-like                                           |
| Slit_qualite_rep_c4859                  | 0.066                        | -3.911                       | $1.833161 \times 10^{-6}$  | $2.083549 \times 10^{-3}$  | hypothetical protein<br>KGM_16335                      |
| Slit_qualite_rep_c44295                 | 0.069                        | -3.862                       | $9.436705 \times 10^{-8}$  | $3.646720 \times 10^{-4}$  | antennal cytochrome<br>p450 cyp4                       |
| Slit_qualite_rep_c25310                 | 0.073                        | -3.779                       | $1.057498 \times 10^{-7}$  | $3.715087 \times 10^{-4}$  | cytochrome p450 4g15                                   |
| Slit_qualite_rep_c186                   | 0.078                        | -3.683                       | $3.173114 \times 10^{-7}$  | $5.839134 \times 10^{-4}$  | antennal cytochrome<br>p450 cyp4                       |
| Slit_qualite_rep_c3543                  | 0.081                        | -3.623                       | $2.217828 \times 10^{-7}$  | $4.745312 \times 10^{-4}$  | juvenile hormone acid<br>methyltransferase             |
| Slit_qualite_rep_c5104                  | 0.083                        | -3.599                       | $3.281553 \times 10^{-6}$  | $3.170309 \times 10^{-3}$  | integrase core domain<br>protein                       |
| Slit_qualite_rep_c20041                 | 0.085                        | -3.555                       | $5.092912 \times 10^{-7}$  | $8.200437 \times 10^{-4}$  | juvenile hormone-<br>binding protein<br>precursor-like |
| Slit_qualite_rep_c45621                 | 0.085                        | -3.554                       | $2.270225 \times 10^{-7}$  | $4.745312 \times 10^{-4}$  | cral trio domain-<br>containing protein                |
| Slit_qualite_rep_c6859                  | 0.086                        | -3.536                       | $9.752707 \times 10^{-6}$  | $8.193122 \times 10^{-3}$  | takeout-like                                           |
| Slit_qualite_rep_c63677                 | 0.087                        | -3.529                       | $5.266288 \times 10^{-6}$  | $4.732801 \times 10^{-3}$  | chemosensory protein                                   |
| Slit_qualite_c63585                     | 0.087                        | -3.519                       | $1.088761 \times 10^{-5}$  | $8.586549 \times 10^{-3}$  | juvenile hormone acid<br>methyltransferase             |
| Slit_qualite_rep_c65324                 | 0.088                        | -3.504                       | $2.227229 \times 10^{-7}$  | $4.745312 \times 10^{-4}$  | chemosensory protein                                   |
| Slit_qualite_rep_c68153                 | 0.089                        | -3.485                       | $2.671096 \times 10^{-6}$  | $2.716364 \times 10^{-3}$  | takeout-like                                           |
| Slit_qualite_rep_c61187                 | 0.094                        | -3.415                       | $2.146711 \times 10^{-5}$  | $1.481384 \times 10^{-2}$  | uncharacterized protein                                |
| gi 300739502 gb FQ020<br>193.1 FQ020193 | 0.094                        | -3.411                       | $7.331637 \times 10^{-7}$  | $1.089707 \times 10^{-3}$  | cytochrome p450 4g15                                   |
| gi 300757879 gb FQ022<br>915.1 FQ022915 | 0.094                        | -3.408                       | $2.301403 \times 10^{-6}$  | $2.470429 \times 10^{-3}$  | antennal cytochrome<br>p450 cyp4                       |
| Slit_qualite_rep_c2094                  | 0.095                        | -3.401                       | $4.587191 \times 10^{-7}$  | $8.057610 \times 10^{-4}$  | cytochrome p450<br>cyp305b1 precursor                  |
| Slit_qualite_rep_c64412                 | 0.098                        | -3.345                       | $8.596635 \times 10^{-7}$  | $1.140359 \times 10^{-3}$  | takeout-like                                           |
| Slit_qualite_rep_c56372                 | 0.102                        | -3.295                       | $8.061075 \times 10^{-7}$  | $1.140359 \times 10^{-3}$  | takeout-like                                           |
| Slit_qualite_rep_c997                   | 0.110                        | -3.187                       | $1.612621 \times 10^{-6}$  | $1.947441 \times 10^{-3}$  | chemosensory protein                                   |
| Slit_qualite_rep_c66981                 | 0.110                        | -3.181                       | $1.784234 \times 10^{-6}$  | $2.083549 \times 10^{-3}$  | cytochrome p450 4g15                                   |
| Slit_qualite_rep_c68492                 | 0.111                        | -3.173                       | $1.119743 \times 10^{-5}$  | $8.654267 \times 10^{-3}$  | takeout-like                                           |
| Slit_qualite_rep_c52629                 | 0.115                        | -3.119                       | $2.578112 \times 10^{-6}$  | $2.692664 \times 10^{-3}$  | takeout-like                                           |
| Slit_qualite_rep_c20865                 | 0.115                        | -3.117                       | $1.004790 \times 10^{-5}$  | $8.231318 \times 10^{-3}$  | cytochrome p450 4g15                                   |
| Slit_qualite_rep_c5736                  | 0.121                        | -3.049                       | $3.690441 \times 10^{-6}$  | $3.478376 \times 10^{-3}$  | antennal cytochrome<br>p450 cyp4                       |
| Slit_qualite_c25137                     | 0.122                        | -3.041                       | $1.189536 \times 10^{-4}$  | $6.129124 \times 10^{-2}$  | no hit                                                 |
| Slit_qualite_rep_c46060                 | 0.122                        | -3.036                       | $5.124890 \times 10^{-6}$  | $4.715387 \times 10^{-3}$  | no hit                                                 |
| Slit_qualite_rep_c64392                 | 0.126                        | -2.992                       | $9.715429 \times 10^{-6}$  | $8.193122 \times 10^{-3}$  | takeout-like                                           |
| Slit_qualite_rep_c2157                  | 0.139                        | -2.850                       | $1.607494 \times 10^{-5}$  | $1.172075 \times 10^{-2}$  | chemosensory protein                                   |
| Slit_qualite_rep_c54066                 | 0.142                        | -2.819                       | $2.327763 \times 10^{-5}$  | $1.578142 \times 10^{-2}$  | takeout-like                                           |
| Slit_qualite_rep_c64822                 | 0.144                        | -2.794                       | $9.689545 \times 10^{-5}$  | $5.201717 \times 10^{-2}$  | takeout-like                                           |

|                         |       |        |                           |                           |                                                        |
|-------------------------|-------|--------|---------------------------|---------------------------|--------------------------------------------------------|
| Slit_qualite_rep_c8209  | 0.146 | -2.780 | $1.883105 \times 10^{-5}$ | $1.323104 \times 10^{-2}$ | takeout-like                                           |
| Slit_qualite_rep_c51949 | 0.150 | -2.737 | $3.435862 \times 10^{-5}$ | $2.212924 \times 10^{-2}$ | no hit                                                 |
| Slit_qualite_rep_c8503  | 0.151 | -2.730 | $2.737699 \times 10^{-5}$ | $1.824063 \times 10^{-2}$ | chemosensory protein                                   |
| Slit_qualite_rep_c60842 | 0.153 | -2.706 | $1.347835 \times 10^{-4}$ | $6.593131 \times 10^{-2}$ | short-chain<br>dehydrogenase                           |
| Slit_qualite_rep_c8778  | 0.154 | -2.694 | $7.617360 \times 10^{-5}$ | $4.393511 \times 10^{-2}$ | tpa: cuticle protein                                   |
| Slit_qualite_rep_c10509 | 0.155 | -2.689 | $9.320994 \times 10^{-5}$ | $5.170297 \times 10^{-2}$ | cytochrome p450 4g15                                   |
| Slit_qualite_rep_c64361 | 0.159 | -2.649 | $5.622170 \times 10^{-5}$ | $3.448621 \times 10^{-2}$ | takeout-like                                           |
| Slit_qualite_rep_c2     | 0.161 | -2.633 | $4.169083 \times 10^{-5}$ | $2.641148 \times 10^{-2}$ | takeout-like                                           |
| Slit_qualite_rep_c3249  | 0.161 | -2.632 | $4.833975 \times 10^{-5}$ | $3.012970 \times 10^{-2}$ | juvenile hormone-<br>binding protein<br>precursor-like |
| Slit_qualite_rep_c66265 | 0.162 | -2.627 | $1.079122 \times 10^{-4}$ | $5.635348 \times 10^{-2}$ | takeout-like                                           |
| Slit_qualite_rep_c1646  | 0.169 | -2.566 | $7.354278 \times 10^{-5}$ | $4.393511 \times 10^{-2}$ | antennal cytochrome<br>p450 cyp4                       |
| Slit_qualite_c6022      | 0.169 | -2.566 | $1.299550 \times 10^{-4}$ | $6.438438 \times 10^{-2}$ | esterase                                               |
| Slit_qualite_rep_c1592  | 0.169 | -2.563 | $7.534025 \times 10^{-5}$ | $4.393511 \times 10^{-2}$ | 3-hydroxy-3-<br>methylglutaryl-<br>synthase            |
| Slit_qualite_rep_c57132 | 0.170 | -2.560 | $8.824547 \times 10^{-5}$ | $5.014938 \times 10^{-2}$ | takeout-like                                           |
| Slit_qualite_rep_c65224 | 0.171 | -2.549 | $7.491208 \times 10^{-5}$ | $4.393511 \times 10^{-2}$ | takeout-like                                           |
| Slit_qualite_rep_c64559 | 0.176 | -2.508 | $9.365511 \times 10^{-5}$ | $5.170297 \times 10^{-2}$ | takeout-like                                           |
