# Supplementary material for: Transcriptome Profiling of Starvation in the Peripheral Chemosensory Organs of the Crop Pest Spodoptera littoralis Caterpillars
Source: MDPI journal article supplement (doi:10.3390/insects12070573), 2021-06-23
Supplement: s1 [file s1]

**Table S1:** Primers used in RT-qPCR experiments.

| Transcripts   | Forward primers (5'–3')   | Reverse primers (5'–3') | Temperatures |
|---------------|---------------------------|-------------------------|--------------|
| <i>c6022</i>  | CCGTAGTTTTTCCTGCGGTA      | CGCTGATCATTGACTCCAAG    | 60 °C        |
| <i>c997</i>   | CAGAAGGGCAGGGAACTGAA<br>A | TACTTGCGGAGGATCTGCTT    | 60 °C        |
| <i>c65324</i> | TGTGTCTGACGACCTTCCTG      | CTGCTGGTGCCTTACATCAA    | 60 °C        |
| <i>rpl8</i>   | ATGCCTGTGGGTGCTATGC       | TGCCTCTGTTGCTTGATGGTA   | 60 °C        |
